# Supplementary material for: Modeling of Non-Steroidal Anti-Inflammatory Drug Effect within Signaling Pathways and miRNA-Regulation Pathways
Source: PLoS One. 2013 Aug 14;8(8):e72477. doi: 10.1371/journal.pone.0072477 (PMC3743815; doi:10.1371/journal.pone.0072477)
Supplement: Information S2 — Pathway Information containing the pathway description, mechanism, transcriptional target and literature reference from all pathways defined in the NSAID model. (XLS) [file pone.0072477.s002.xls]

## Sheet: Sheet1
	Supplementary Information 2: Pathway Information
	Pathway information contains the pathway description, mechanism, transcriptional target and literature reference from all pathways defined in the NSAID model
Name	Description	Mechanism	Transcriptional Target	Reference (PubMed)
MAPK signaling	A mitogen-activated protein kinase (MAPK) cascade, which composes of diverse protein phosphorylation cascades that function to control different cellular processes related to proliferation, angiogenesis, apoptosis and other.	The activation of this pathway triggers the phosphorylation of protein kinase RAS and its cousin that in turn phosphorylate MEK1/2. Afterwards, ERK1/2 is phosphorylated by MEK1/2 and activates diverse down-stream targets (such as RPS6KA2, TSC2, AR, ESR1, SMAD2/3, EIF4EBP1)	INS,IGFBP1,FN1,ERBB2,CCL5,MMP1,HLA-DRA,CRH,ADRB2,MITF,LOR,CFTR,PLAT,TRH,CCND1,EGR1,RPL10,CCNA2,PSEN1,HLA-DRB1,CGA,DBH,SLC25A3,BDNF,VIP,FOS,PTH,PENK,POU3F2,ATF2,TYRP1,TYR,HIF1A,NR4A2,FOSB,ELK1,HRAS,SRF,JUN,JUNB,KRT18,DUSP6,PLAU,MMP2,DNAJB4,MMP13,IL11,TIMP1,APOE,EGR2,ACTB,PPARGC1,THBS1,ACTC1,MYL3,DMD,NR1H2,PRKCA,TLR9,PYGO2,SULT1A3,SULT1A1,KCNK5,TNF1,NOS3,ACHE,MYCN,MDM2,PTK2,MUC5B	8627725, 12551925, 19176525, 1827203, 12527906, 8974401, 15913451, 20676126, 11526509, 21235400, 21585337, 12551925,17336901, 22241220, 10085121, 19717562, 7957559, 16281055, 19176525, 12414794, 12414794, 12527906, 12833145, 21785462, 10078200, 11018017, 17217616, 20578891, 18283323, 18380893, 1935459, 18613924, 21224048, 19401450, 18474118, 18528739, 19470936, 17909001, 19774459, 21524841, 16316…
NFkB signaling	Includes relevant transcriptional regulations of NF-kappa-Bs and has a multitude of functions (initiating inflammatory response and invading pathogenes as a part of an innate immune response).	The activation of diverse signaling pathways leads to phosphorylation of I-kappa-B kinases (IKBKA, IKBKB, IKBKE, IKBKG) that phosphorylate the inhibitors of NF-kappa-Bs to free and activate them. The activated NF-kappa-Bs transcriptional regulate many genes (such as IL2, IL2RA, IL13RA2, IL9, IL13, IL15, CSF2, CSF3, VEGFC)	RELB,REL,NFKB1,NFKB2,IKBK,BCL3,MEFV,STAT4,CYBA,FSTL3,PTGS2,TNFRSF10B,PIGR,IL1,PTPN6,DEFB4,IL1RN,CCL5,SERPINA3,CCND1,TP53,CCL2,TAC1,ING2,HAS2,FAS,IFNG,IFNB1,MMP9,VCAM1,IRF4,BCL2A1,ALOX5AP,BCL2,COL1A2,CRMP1,MUC5B,TNF,IL8,CCL,IL6,IL12A,IL12B,IL2,IL2RA,IL13RA2,MYC,NR4A2,VEGFC,PDGFB,IL9,NOS2,SOD2,IL11,BDKRB1,CSF2,CSF3,IL13,IL15,TGM2,IER3,JUNB,TNF1,TAP1,IFI6	20723331, 22253230, 11916364, 15870263, 19800320, 20471435, 22017428, 7539102, 7533326, 22237843, 14967450, 12776189
JAK/STAT signaling	The Janus kinases (JAKs) phosphorylate the signal transducers and activators of transcription (STATs) that convey the messeage from cell-surface into the nucleus.	Diverse ligands (such as IL2, IL4, IL5, IL9, CSF, CSF3, CTF1, IL12A, IL12B, IL6, LIF, OSM and other) bind to their corresponding receptors and phosphorylate different JAKs or combination of them. After the activation of STATs, the activated STATs can be translocated into nucleus to carry the signal information into nucleus by transactivating many target genes (such as SOCS3, CISH, MCL1, PIM1,MYC,…	IL10,STAT1,SOCS3,CISH,MCL1,PIM1,MYC,TIMP1,IRF1,CD40,FOS,FCGR1A,GBP1,IL21,ISG15,CCL19,IRF7,PRF1,IFNG,IL2RA,IRF4,S100P,CDKN1A,BCL2L1,BCL2,MVP,CD8_BEGIN,S100A10,TAP1,CYBB,HLA-E,CCL2,WARS,FCER2,MUC1,IVL,XAF1,VIP,AGT,ICAM1,TRH,SOAT1,CCND1,OPRM1,MYD88,NOS2,BACE1,CIITA,IL6ST,IDO1,MSR1,FCGRT,IL1,NOX1,LY6E,CCR5,NOS3,REG1A,VEGFA,TWIST1,FAAH,MMP1,VIM,CYP19A1,IAP,CD274,FGG,MMP2,IL1R1,CRP,HMOX1,STAT4,CCL17,LT…	22272258, 18445337, 16327802, 12792903, 15642335, 10851046, 10454585, 11021818, 15317731, 12438221, 15554904, 22121102, 10851046, 12060651, 22260007, 10192386, 7815885, 18445337, 21941295, 22260696, 20734398, 19478061, 8195176, 18827006, 9271438
WNT signaling	Involves a large number of molecular reactions regulating the production of WNT signaling molecules, interactions with receptors and activation of the downstream molecules. It includes the canonical Wnt pathway and non-canonical Wnt pathway.	Canonical WNT pathway: the ligand-receptor binding (WNT:FZD:LRP5/6) leads to the activation of DVL, which in turn inhibits the CTNNB degradation complex. This inhibition of degradation enables the CTNNB freely translocate into the nucleus where this transcription activator regulate many genes transcription (including MYC, CCND1, WISP, JUN, PITX2). Non-Canonical WNT pathway: the ligand-receptor bi…	DKK,WNT,APC,WNT_CA,NKD,MYC,CCND1,WISP,PITX2,MMP7,JUN,PPARD,WNT2B, CD44, ETV4, PTGS2, TCF, JAG, SOX9, ABCB1	16672224, 17336901, 22211245, 12482967, 10858654, 19360354, 22259056, 15961082, 17609434, 20181957, 21596859, 19176525, 9878061, 15695591, 20471435, 10078200, 11018017, 14967450, 17217616, 20578891, 18283323, 18380893, 1935459, 18613924, 21224048, 19401450, 18474118, 18528739, 19470936, 19774459, 21524841, 16316627, 12138125, 19176525, 14551213, 18348191, 19176525, 21704033, 14530294, 19360354, 1…
Hedgehog signaling	Functions in a very similar way as the WNT signaling pathway. It controls the cell proliferation and development begins with the interaction between ligand Hedgehog and transcription factor GLI.	The ligand-receptor binding (PTCH:HH) enables the SMO, SUFU become active, which leads to the activation of GLI. The active GLI migrates into the nucleus and activates a number of target genes (including WNT, CCND, PTCH, FOXs)	PTCH,HH,HIP1,GLI,IGFBP6,BCL2,JUP,SOX9,NHLH1,CCND1,CCND2,WNT,BMP,WNT_CA,WNT2B,FOXA2,FOXC2,FOXE1,FOXF1,FOXL1,GH2,MMP3,NOS2,SELP,IL8,SFTPB	19360354, 15961082, 12138125, 20093492, 20822955, 19360354, 11181952
Notch signaling	This is a highly conserved signaling pathway that is involved in the proper development of organs (such as brain, immune system, pancreas, heart, blood vessels). This pathway is also a communication channel in which cells decide to overtake different fate of differentiation.	Via the ligand binding (DLL:NOTCH, JAG:NOTCH, CNTN1:NOTCH), the receptor Notch is cleaved away by the complex (PSEN:APH1A:NCSTN:PSENEN) from the cell surface. The internal portion of the Notch receptor is set free and migrates into the nucleus to transcriptional regulate many target genes (including IL12RA, CDKN1A, PTCRA, DTX1, HEYL).	NRARP,HES1,DTX1,LASS1,CDKN1A,IL2RA,PTCRA,JAG,HES5,HEY1,HEY2,HEYL,MYC, AKT, CDKN1B, TP53, HES1, IL2RA, PTEN, NFKB1	19360354, 15961082, 12138125, 20093492, 20822955, 19360354, 11181952
AMPK signaling	Functions as a sensor of cellular energy status such as regulates food intake and energy expenditure, mediate the effects of hormones and cytokines such as leptin, adiponectin. Therefore, this pathway controls the different cellular processes such as proliferation.	Upon the ligand-receptor binding (ADIPOR:ADIPOQ, LEPR:LEP ??) or the cellular ATP:ADP ratio falls, the kinase AMP-activated kinase protein (AMPK) is activated, which in turn activates diverse downstream cellular components (including TP53, PFKFB2, SREBF1, ELAVL1, EEF2K, MEF2, CRTC2) and negatively regulate the activity of mTor signaling pathway.	CCNB1,CCNA1,PKLR,TP53,FAS,TSC2,SLC2A4,PPARGC1,ACACB, PRODH, CHEK1, SCN3B, SUB1, RFWD2, NDRG1, DUSP1, TNFRSF10B, CX3CL1, FANCC, APC, HDAC5, PMAIP1, EI24, POLD1, SESN1, TGFA, MSH2, THBS1, IGFBP3, TP63, RB1, PTTG1, CASP1, DCR1/2, CAV1, CD82, ATF3, CDC25C, HRAS, TRIM21, ACTA2, PERP, APAF, TSC2, CCNG2, BAX2, CD44, MDM2, PTK2, SFN, TP73, BBC3, PCNA	19629071, 14764989, 16148943, 16105857, 19948445, 21989556, 11971974, 21725320, 16054073, 16176927, 12110366, 22243683, 11069105, 22259067, 20164678, 20107043, 19448675, 15509864, 7929321, 21785462, 20837708, 20597028, 7539102, 7533326, 19176525, 21704033
Cell_Cycle	A series of cellular events (G0, G1, S, G2 and M) that leads to cell devision and duplication for proliferation.	G0: the resting phase where the cell has accomplished a cycle and stopped dividing. G1: the begin phase where G1 checkpoint mechanism (CCND1/2/3 + CDK4/6) ensures the cellular readiness for DNA synthesis. S: the DNA replicative phase. The complex CCNE1/2 + CDK2 and CCNA1/2 + CDK2 organize and inspect the DNA replication process. G2: the second gap phase where G2 checkpoint mechanism (CCNA1/2 + CD…	CCND1,CCND3,CDKN2B,CDK4_6,INK_ACD,CCNE,CDKN1A,CDKN1B,ERBB2,HSP90,EIF4E,CAD,CDC25A,DDX18,MUC5B,ODC1,BRD7,TERT,MYC,VEGFA,NOP16,PIGR,YBX1,CXCR4,CCND2,CUL1,RBL2,CCNA2,CCNA1,RBL1,RB1,E2F1,CDKN1C,TP53,E2F2_3,E2F6,PMAIP1,POMC,BBC3,GADD45B,DIRAS3,TNFSF11,BMI1,PTPRO,AURKB,DUSP4,CYC1,H19,MAP3K5,HIST1H2AD,DBF4,BIK,TP73,BCL2,KIR3DL1,CDK1,PCNA,STMN1,IDS,MCM7,CDC25C,SFN,CCNG2	18599021, 15659849, 19421138, 14967450, 12138125, 21704033, 21785462, 17084835, 22272142, 22018469, 19421138, 15961082, 15103331, 22272343, 20676126, 11526509, 22017428, 9271438, 22272343, 21785462, 17324927, 22272343, 10807576, 21971555, 10882109, 12195423, 17318211, 16043028, 21704033, 15572696, 19234120, 18427546, 16246726, 19745809, 20932473, 20932473, 7780740, 17217616, 20944102, 10469457, 2…
Death_Receptor	Includes the extrinsic and intrinsic apoptosis pathways that are defined as a common property of multicellular organisms.	Upon the ligand-receptor binding (FAS:FASLG, TNFSF10:DR4/5, TNF:TNFRSF1A), different capase proteins (CASP8/10) can be activated to trigger the apoptosis. In response to signals resulting from DNA damage, loss of cell-survive factors or other, pro-apoptotic proteins (including BCL2, BCL2L11, PMAIP, BBC3, BAX, BAK) can promote the mitochondrian release of other pro-apopotoic factors including CYCS…	FAS,FASLG,CASP8,IAP,BCL2L1,BCL2L11,APAF1,HSP90,TNFSF10,DR4_5,DCR1_2,TNFRSF1B,DR4_5,BIK,EGR2,EGR3,ATP7B,DIO1,NFKB1	15654015, 12654257, 22266266, 22017428, 10755616, 7539102, 7533326, 10690403, 22017428, 11445667, 11484955, 10611223, 14962714, 15193260, 22017428, 15870263, 22241220, 21467543, 10601313, 21971555, 9819402, 9632757, 9915863, 15870263, 19800320, 9447982, 17324927, 22215472, 17324927, 12173742,16093321
EGFR signaling	Epidermal Growth Factor (EGF) signaling pathway is one of the most well studied Receptor Tyrosine Kinases (RTKs) pathway. This pathway regulates activities of a wide range downstream targets and plays key roles in diverse cellular processes including cell growth, proliferation. The mutations occurring in different pathway-components such as EGFR, SRC are highly cancer-related.	Binding of ligands (AREG, BTC, EGF, EREG, TGFA) to the dimer receptor (EGFR:EGFR, EGFR:ERBB2) enables the auto phosphorylation of the ligand-receptor complex, which in turn invokes signaling cascades, in which diverse cellular proteins (including SRC, GRB2, SOS1, PLCG, CBL, JAK1/2) take part in.	PTEN,SRC,EGFR,EGFR,TGFA,AREG,CAV1,ERRFI1,MMP9,CCND1,I_SMAD,PTGS2,IL6,CD44,TP53,CCND1,PGR,STAT4,MSH2,AXL,FOSL1,ABCA1,RELB, ICAM1,IL5,TPT1,TGFB,SPRR1B, IL2,BRCA1,IVL,MMP1,MMP13,TIMP1,IL11,MSH2,SOD2,IBSP,NQO1,VDR,PLAUR,PRL,UGT2B15,CCL5,TNF1,POLB,CGA,TGFB2,FN1,VIP,PLAT,PENK,IFNB,CCNA,FOS	11021818, 15317731, 12438221, 12652307, 15642335, 10851046, 10851046, 12060651, 10454585, 12833145, 21585337, 18449947, 21707536, 9566916, 20471435, 12551925, 9878061, 9512511, 10085121, 12551925, 9685399, 9374534, 12833145, 8939069, 19176525, 11243842, 12833145, 12234920, 20596630, 14729671, 18339848, 21585337, 10764742, 16093321, 22260672, 12826400, 8195176, 18827006
Estrogen signaling	This pathway maintains functions of a wide range of mammalian tissues and plays important roles in cellular processes related to growth, development and reproduction. This pathway including signaling transduction process starting from ligand binding of receptor (including ESR1/2, GPER) to the activation of downstream targets.	The ligand-receptor binding (including Estradiol:ESR1, Estradiol:GPER) enables complex formation with SRC, GRB2:SOS1 or the production of cAMP, which in turn leads to activation of RAC1:GTP, CDC42:GTP, KRAS:GTP, HRAS:GTP, PRKACA, RAP1:GTP, RAPGEF:cAMP and other.	ESR1,CCND1,TFF1,IGFBP4,C3,ADORA1,GREB1,MYC,CISH,MUC1,REG1A,MCL1,PIM1,HGF,VEGFA,FOS,BCL2,VIP,MMP,SOCS1,IL21	8788178, 14623541, 12431838, 18271749, 22230296, 21235400, 10085121, 22241220, 22230296, 21704033, 21585337, 19717562, 15961082, 17609434,19126541
FGF signaling	Fibroblast Growth Factor (FGF) is one of the well studied Receptor Tyrosine Kinases (RTKs) pathway. The FGF binding can lead to activation of a plethora of signaling pathways involved with cell growth, proliferation and contribute to important functions for normal development, tissue maintenance.	The ligand-receptor binding (FGFR:FGF) enables auto.phosphorylation and the subsequent complex formation with FRS, GRB2, GRB14, GAB1, PI3K, which in turn activates PRKCG, PRKCB, KRAS, HRAS, AKT, ERK, MAP3K7, RASGRP1/2/3/4, CAMK, CREB.	FGFR,THBS1,SPRY1,ELF5,KRT18,FGFBP1,PTGS2,CCND1,KRT18,PDGFRA,VEGFB,TEAD,RET,WNT2B,CDH2,FLT1,MYCN,RARA,TYMS,KDR,MKI67,PTGES,VEGFA,TP53,FOS,MYB,PGR,STAT1,TOP2A,PTGIR,TBXA2R,HMGA2,CDH1,FES,NF1,GATA,PDGFA,FOSL,ABCB,MYBL,GPI,BNIP3L,DDIT4,PKM2,LEP,ENG,ADRA1B,CP,TNP1,TFR2,REDD,ADM,END,MET,ENO,PGK1,CD99,TF,HK1,CCNGNR4A,ETS1,IGFBP2,PFKL,LDHA,LRP1,VIM,GAPDH,VEGFA,TGFA,KRT14,IDS	17394208, 22040915, 21585337, 12652307, 12234920, 22260672, 12826400, 17394208, 10521483, 9748281, 11191051, 10521483
HIF1 signaling	Directly influencd by the mTor signaling and MAPK signaling. Includes a large number of transcriptional regulations based on the function of HIF1.	The activation of HIF1A by ERK or MTOR:MLST8:RPTOR enables the complex formation of ARNT:HIF1A and ARNT2:HIF1A, which then transcriptional regulate many target genes (including ABCB1, IGF2, END1, ADM, VEGFA, HK1, HK2, TGFA, MET).	FFCCNG2,IGF2,IGFBP1,IGFBP3,IGFBP2,CDKN1A,TGFA,TGFB3,ADM,EPO,NOS2,BNIP3,BNIP3L,DDIT4,GPI,MET,LRP1,KRT14,VIM,CD99,PROK1,ENG,LEP,ADRA1B,EDN1,HMOX1,ETS1,NR4A1,CITED2,ABCB1,TGM2,HK2,HK1,ENO1,SLC2A1,GAPDH,LDHA,PFKL,PGK1,PKM2,TNP1,CP,TF,TFR2,NT5E,MMP2,REDD1_2,VEGFA,IDS,ARNT2,VEGFB,ADM, HK1,NR4R1	14967450, 9271438, 16043028, 12414794, 12527906, 10611972, 10873592
IGF1R signaling	This signaling pathway influences the cellular processes including proliferation, cell motility, adhesion and contributes to the apoptosis protection and hypoxia signaling. This pathway is often deregulated in different types of cancer and therefore the receptor IGF1R becomes a putative therapeutic target.	The ligand-receptor binding (IGF1R:IGF2, IGF1R:IGF1) leads to the recruitment of IRS and SHC and subsequent activation of corresponding complexes that in turn regulate the downstream components such as RAF, ERK, PKC, ATF2, MAP3K7, PRKCB, PRKCA, CAMK, SMAD4.	IGF1,IGF2,IGF1R,IRS2,IGFBP3,SRC,MMP2,AR,LCP1,KLK3,NKX3,PIGR,CDH1,STAT4,HAS2,IL13,PDGFB,NFKB2,BCL3,DEFB4,TGM2,IL15,IER3,RELB,IL9,MYC,IRF4,JUNB,MMP9,NOS2,SOD2,CSF3,CSF2,BDKRB1,PTGS2	22166507, 14534077, 18691225, 20878056, 16037382, 18691225, 18691225, 9710587, 8589707, 15208677
TGF_beta	Includes the actions of the transforming growth factor-beta family, which controls the activity of Smad transcription factors.	The ligand-receptor binding (TGFB:TGFBR) activates the SMAD2/3 and other protein kinase (such as MAP3K7, MAPK14, ERK). The activated SMAD2/3 can then translocate into nucleus with the help of SMAD4 to conduct the transcription regulation.	I_SMAD,CDKN1A,CDKN1B,CDKN2B,ITGA5,TGFB2,TGFB1,NANOG,MMP1,MMP13,SKIL,PTHLH,TNC,JUN,SERPINE1,MYC,COL1A2,TGFB3,PPARG,IGHA1,EPO,CYR61,ELN,FBLN5,ACTA2,TERT	15702493, 21585337, 10025408, 10777621, 22241220, 16751101, 20822955, 21585337, 20822955, 20822955, 10078200, 11018017, 19717562, 18187669, 14967450, 21785462, 16327802, 16794634, 20822955, 14729671, 18339848, 10757800, 9878061, 22241220, 22241220, 21467543, 10601313, 22241220, 11818334, 11387212, 17540773, 20471435
TLR signaling	This pathway plays a crucial role in inflammatory responses and is highly involved also in many other cellular processes such as apoptosis.	After ligand binding, TLRs undergo the conformational changes required for recruitment of downstream signaling components including MyD88, IRAKs, TAK1, TAB2 and other, which in turn activates the downstream components including IRFs, IFN-beta, AP-1, NF-kB, JNKs and other.	MYD88,SOCS1,IL1,TNF,CCL5,IFNB1,IL6,IFNA,IL8,IRF7,CCL,NOS2,ABCC2,CD8_BEGIN,CD40,CXCL,ISG15,CCL19,IL28AB9,IL12A,IL12B	22272328, 22253024, 15229469, 18445337, 21941295, 9878061, 15572696, 18067405, 15870263, 19800320
ERBB signaling	This pathway has a very similar structure as the EGFR signaling pathway. It includes reactions based on receptors (ERBB2/3/4) that through ligand-receptor association regulate signals of cell differentiation, proliferation, migration and survial.	The signal transduction of this pathway begins with ligand receptor association such as ERBB4:EREG:ERBB2 and ERBB3:NRG1:ERBB2, which enables the activation of diverse cellular essential protein kinases including KRAS, HRAS, RAF, STAT5, PI3K, PKC, S6K, PICTOR.	AKT, ERK, PKC, PRKCA, PRKCG, KRAS, BRAF, CAMK, MEF2, CREB, PTGS2, RRAS, STAT1, 3, 5, ERRFI1, HRAS, PLCG, CREB, ETS1, MYC, MAX	11389077, 17641798, 10706134, 12833145, 11243842, 14967450, 20676126, 11526509, 12833145, 12209129, 11389077, 12833145, 12833145, 21585337, 12652307, 10851046, 10851046, 12060651, 10454585, 15572696
VEGF signaling	Plays key roles in cellular processes related to blood vessels such as angiogenesis, vasculogenesis.	The ligand-receptor bindings (VEGFA:KDR, VEGFA:FLT1, VEGFB:FLT1, VEGFC:KDR, VEGFC:FLT4) enables the auto.phosphorylation of corresponding ligand-receptor complex, which recruits the components such as GRB2, SOS1, SHC, PLCG. These recruitments lead to the subsequent activation of diverse downstream targets including CALM, PRKCA, ATF2, PTK2B, RASGRP1, MAP3K7, MAP3K.	VEGFA,VEGFB,VEGFC,FLT1,PLCG,PTK2,E2F2,NOP16,TERT,CAD,ERBB2,CUL1,CDK4_6,HSP90,BRD7,ODC1,DOX18,CDC25A,CCND2,YBX1,MYBL2,FOXM1,MUC5B,IDS,CXCR4,E2F1,EIF4E,PIGR,IL6,PSEN1,MITF,LOR,SLC25A3,BDNF,PTH,CFTR,ADRB2,INS,RPL10,CCNA2,PENK,CGA,ERBB2,EGR,FN1,FOS,IGFBP,SOX9,PLAT,VIP,TRH,CCL5,DBH,NF1,AXL,FOSL1	22230296, 16043028, 19264924, 17647198, 21829020, 9271438, 12062403, 20432459, 12833140, 12771128, 21585337, 12652307, 22260672, 12826400, 8195176, 18827006, 14729671
mTor signaling	Function as an important sensor to coordinate different cellular processes with the nutrient level and cellular growth factors. This pathway including the signal transduction processes started from mTor complex 1 (mTORC1) and mTor complex 2 (mTORC2).	After activation by RHEB:GTP, the mTORC1 (MTOR:MLST8:RPTOR) is created, which in turn activates diverse downstream components including PPARGC1, HIF1A, EIF4BP1, EIF4G1, RPS6, PPARG, RPS6KB1, PDCD4. The mTORC2 (MTOR:MAPKAP1:MLST8:PRR5:PICTOR) enables the activation of components including SGK1, PRKCG, PRKCA, NEDD4L, IKBK, RAF.	TSC2,REDD1_2,EIF4E,PPARG,PRKCA,SELE,PENK,CCL5,TNF1,POLB,CGA,TGFB2,ATF2,FN1,ATF3,PTGS2,IL6,CCNA2,FOS,IFNB,TNF,PLAT,PLAU,VIP,RB,PRODH,CHEK1,SCN3B,SUB1,RFWD2,NDRG,DUSP1,TNFRSF10B,CX3CL,APC,HDAC5,PMAIP,EI24,POLD1,SESN1,TGFA,MSH2,TP63,IGFBP3,CASP1,DCR1/2,TP53AIP,PTEN,CAV1,ATF3,CDC25C,HRAS,TRIM21,DDB3,ACTA2,PERP,TSC2,CCNG,BAX,EGFR,CD44,MDM2,PTK2,SFN,TERT,TP73,BBC3,PCNA	15632115, 16258273, 18929489, 19901542, 18497260, 16980408, 15961082, 17609434, 20837708, 20597028, 19717562, 12551925, 18591934, 10611223, 7957559
COX signaling	Plays major roles in diverse cellular processes to regulate inflammatory and neoplastic processes and has now received considerable attentsion due to its significant contribution to human tumorigenesis. The key components of this pathway is cyclooxygenase, which is essential to mediate the signal from diverse cellular responses.	This pathway starts with the conversion from arachidonic acid into PGG2 with the enzymatic catalyzation of COX. The COX catalyzes PGG2 further into PGH2, which is catalyzed by diverse enzymes into different prostaglandin derived products such as PGE2, PGI2, PGD2, PGF2 and TXA2. All those prostaglandin derived products can bind to corresponding receptor to trigger signal cascades leading to activa…	PGG2, PTGS1/2, O2, PGH2, PGE2, PGD2, PGI2, TXA2, PTGES, PTGES2, HPGDS, PTGDS, PTGIS, TBXAS1, HPGD, PTGER1, PTGER2, PTGER4, PTGDR, PTGIR, TBXA2R, PPARD, IL2, IL4, IL10, ADCY, cAMP, PRKACA, PRKAR, RAP1, RAPGEF, ESR1, MLXIPL, PLCB, IP3, ITPR, PRKCG, PRKCB,	1907059, 15887126, 12621132, 17589567, 21097678, 17116820, 10656441, 9160111, 11266647, 10369853, 10528897, 11688844, 11509575, 11758830, 12615041, 9558081, 14647459, 16622456, 16391811, 12684433
